# Supplementary material for: Mechanical Occlusion Chemically Assisted Ablation (MOCA) for Saphenous Vein Insufficiency: A Meta-Analysis of a Randomized Trial
Source: Hindawi journal article supplement (doi:10.1155/2020/8758905), 2020-01-29
Supplement: f1 [file 8758905.f1.pdf]

## 1 MOCA vs thermal ablation ITT analysis

## 1.1 Anatomical success mid-term

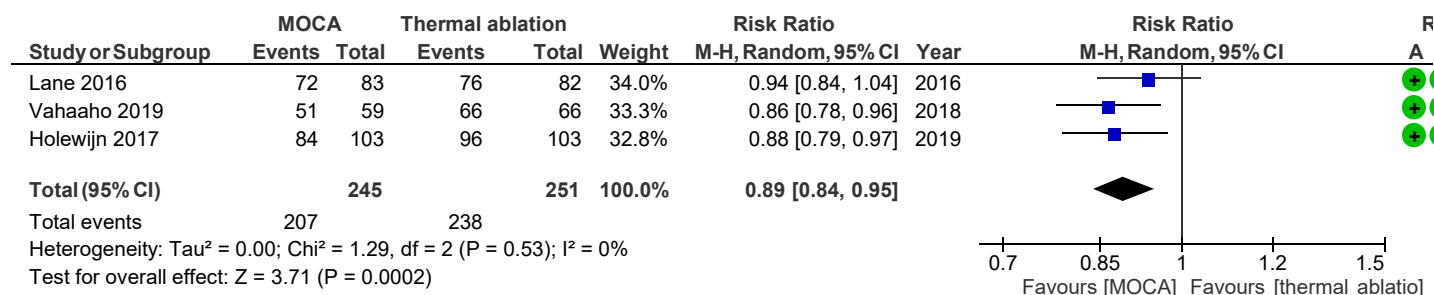

## Risk of bias legend

- (A) Randomization process  
 (B) Adhering to intervention  
 (C) Missing outcome data  
 (D) Measurement  
 (E) Reporting

## 1.2 Anatomical success short-term

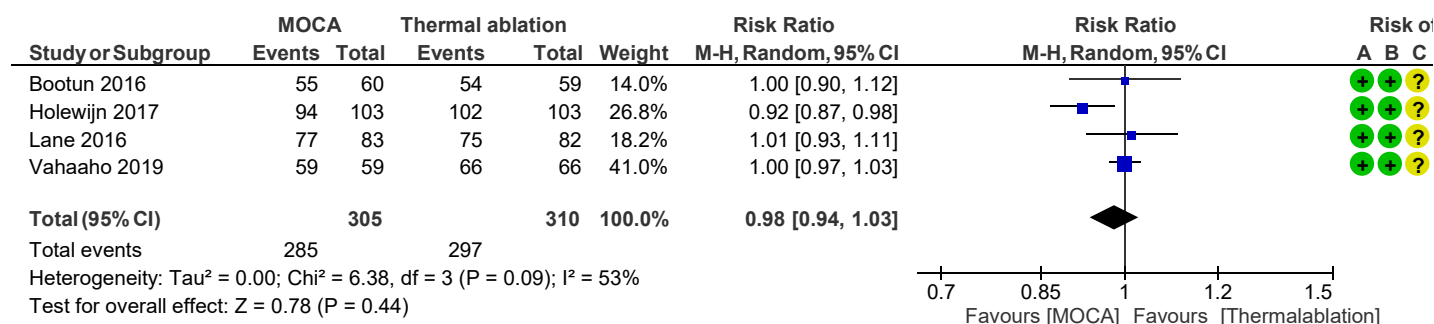

## Risk of bias legend

- (A) Randomization process  
 (B) Adhering to intervention  
 (C) Missing outcome data  
 (D) Measurement  
 (E) Reporting

## 2 MOCA vs thermal ablation PP analysis

## 2.1 Anatomical success mid-term

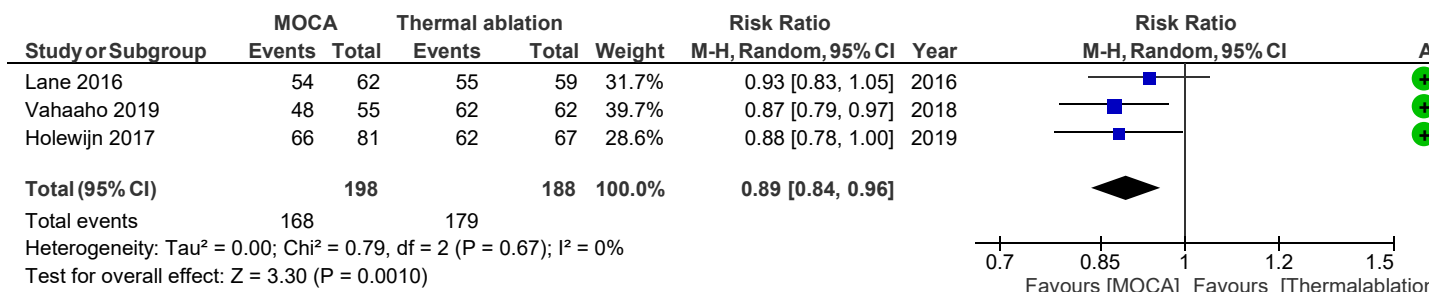

## Risk of bias legend

- (A) Randomization process
- (B) Adhering to intervention
- (C) Missing outcome data
- (D) Measurement
- (E) Reporting

## 2.2 Anatomical success short-term

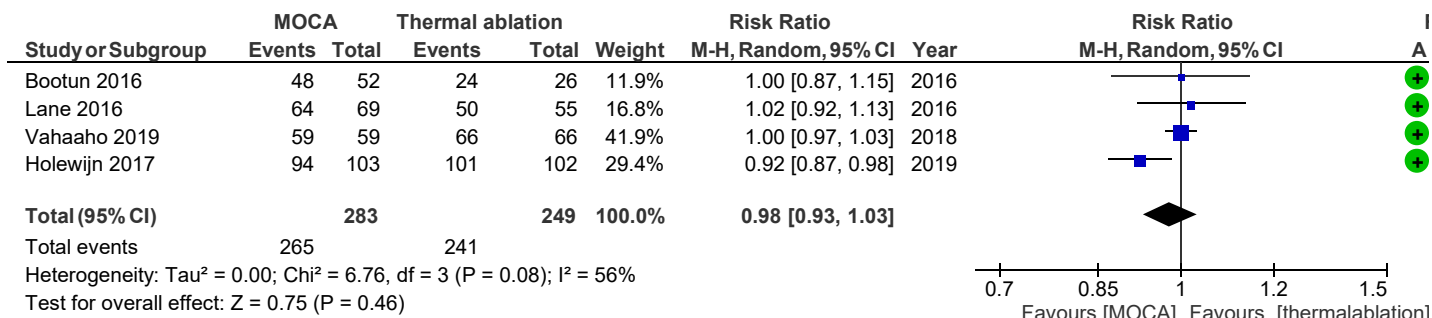

## Risk of bias legend

- (A) Randomization process
- (B) Adhering to intervention
- (C) Missing outcome data
- (D) Measurement
- (E) Reporting

## 5 Complication

## 5.1 Phlebitis

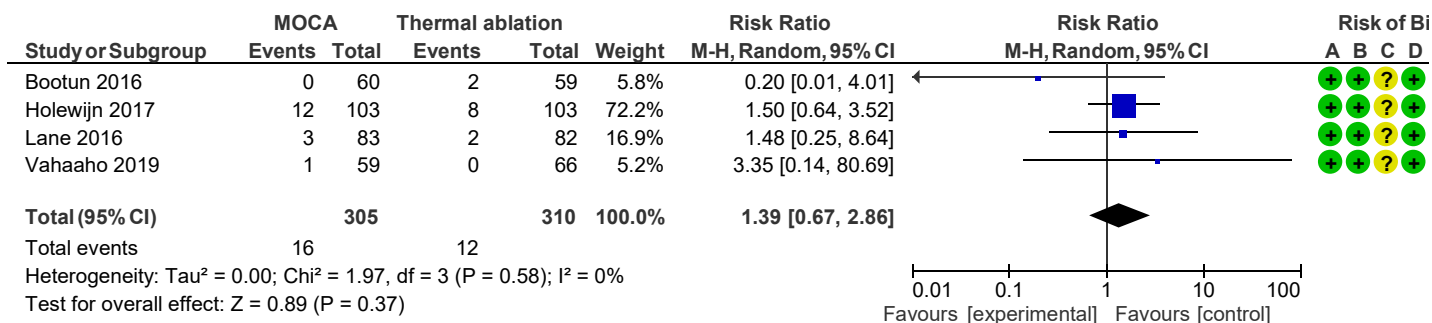

## Risk of bias legend

- (A) Randomization process  
 (B) Adhering to intervention  
 (C) Missing outcome data  
 (D) Measurement  
 (E) Reporting

## 5.2 Major complication

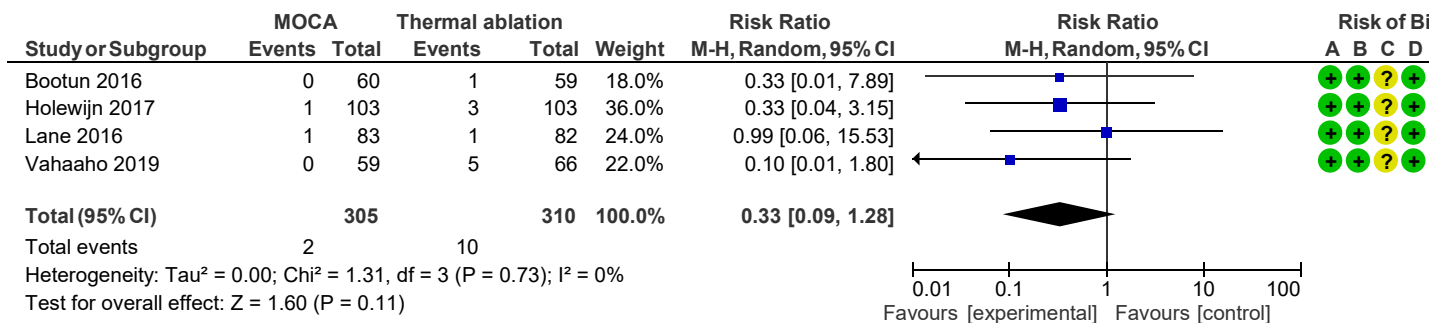

## Risk of bias legend

- (A) Randomization process  
 (B) Adhering to intervention  
 (C) Missing outcome data  
 (D) Measurement  
 (E) Reporting

## 5.3 DVT

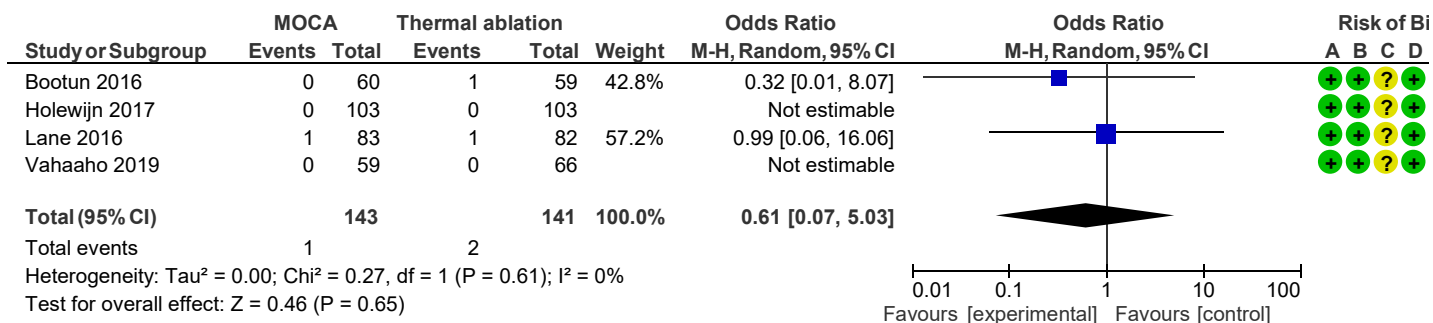

## Risk of bias legend

- (A) Randomization process  
 (B) Adhering to intervention  
 (C) Missing outcome data  
 (D) Measurement  
 (E) Reporting

## 5.4 Sensoric disturbances

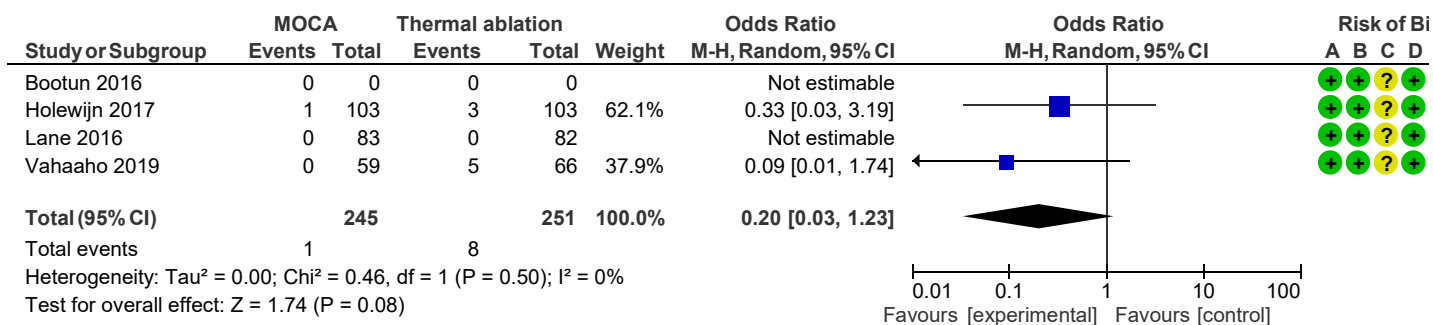

## Risk of bias legend

- (A) Randomization process  
 (B) Adhering to intervention  
 (C) Missing outcome data  
 (D) Measurement  
 (E) Reporting
